# Supplementary material
Source: Springer Nature journal article supplement (https://www.springermedizin.de/resource/supplementary/13613_2012_84_MOESM5_ESM.pdf/12196116)

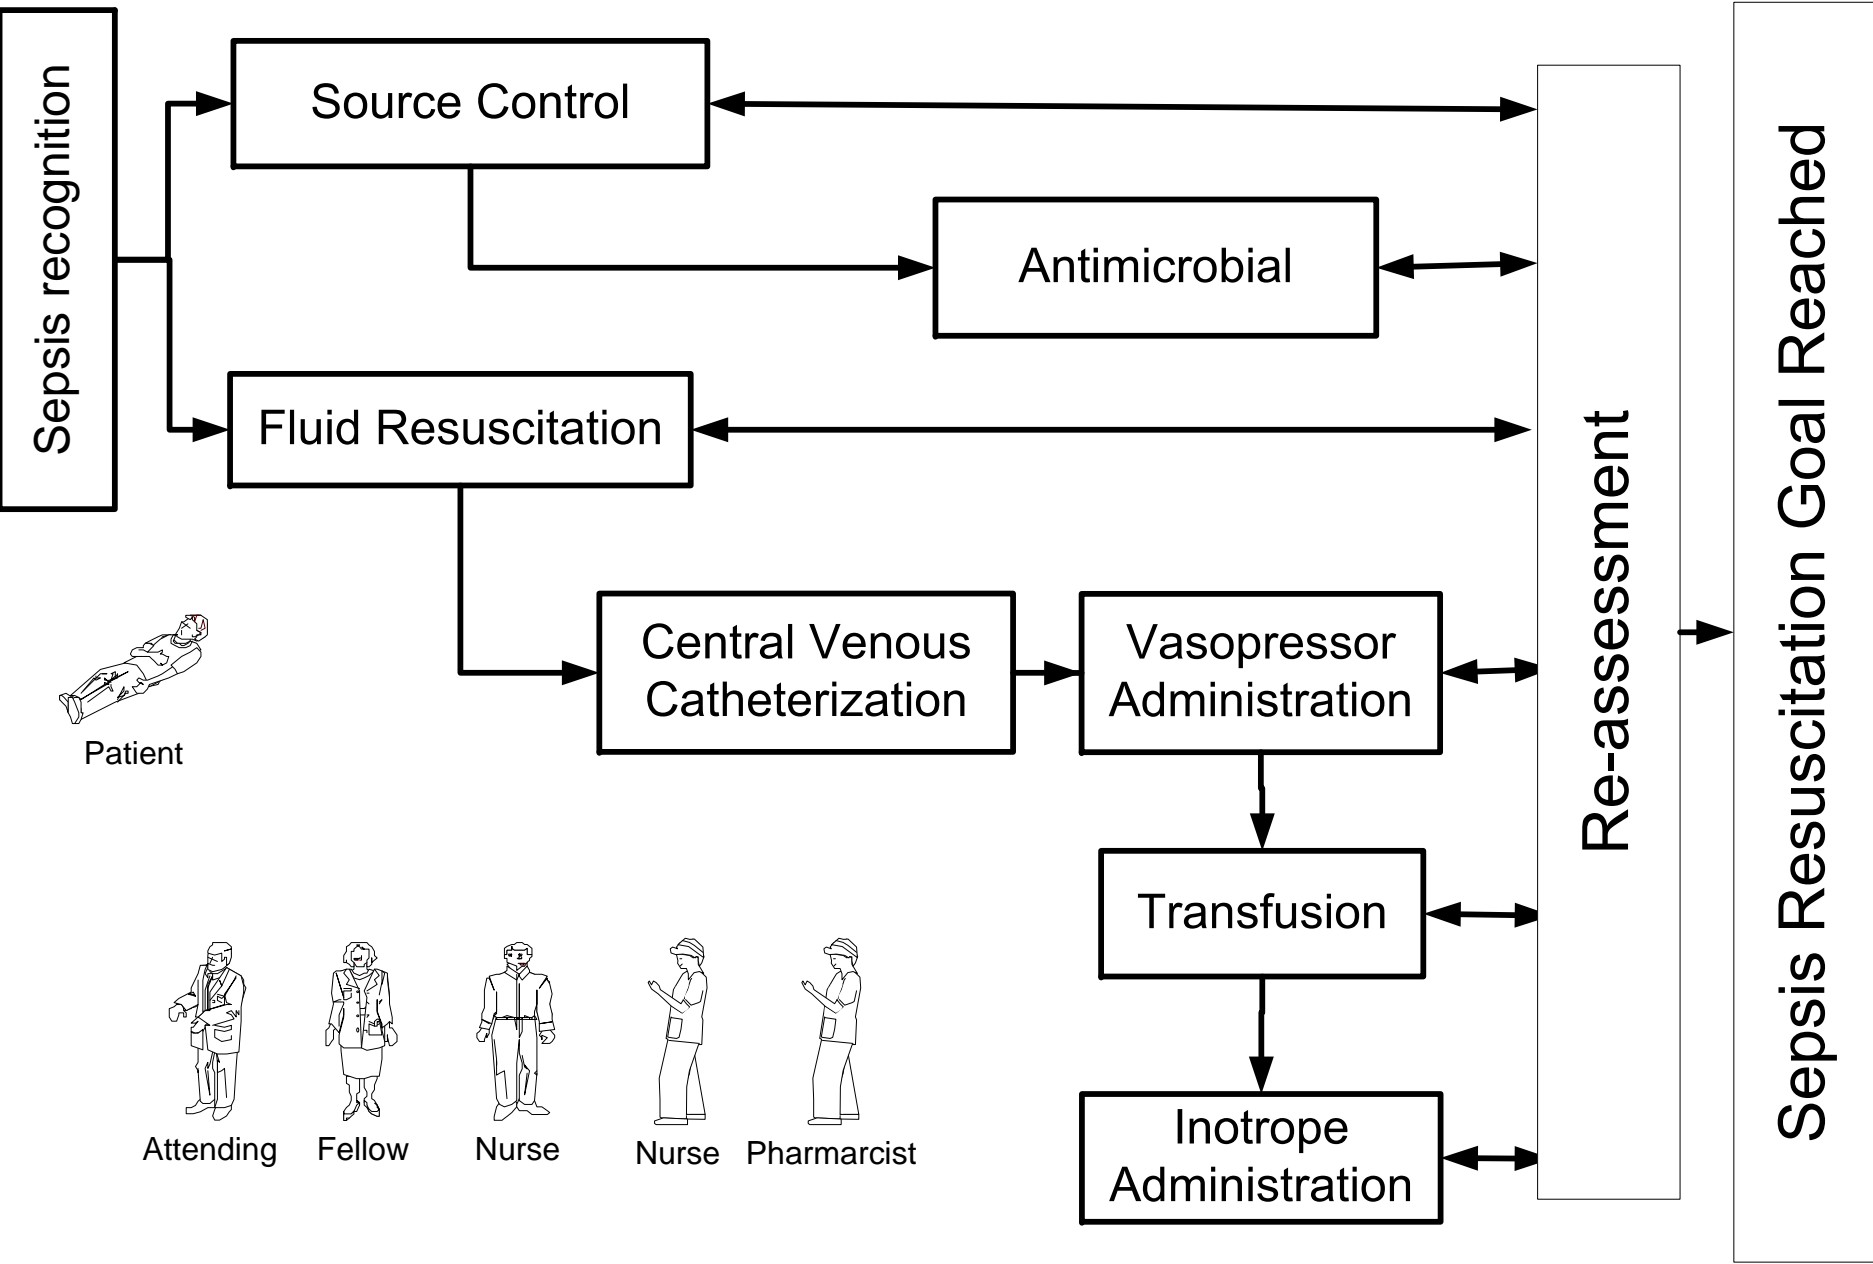

Supplement: MOESM5 [file 12196116]
